# Supplementary material for: Expression Profiling of microRNA From Peripheral Blood of Dairy Cows in Response to Staphylococcus aureus-Infected Mastitis
Source: Front Vet Sci. 2021 Aug 4;8:691196. doi: 10.3389/fvets.2021.691196 (PMC8371400; doi:10.3389/fvets.2021.691196)
Supplement: Supplementary Table 4 — Differentially expressed miRNAs of peripheral blood at different times of mastitis caused by S. aureus. [file Table_4.xlsx]

## Sheet: Table S4
Table S4 DIE-miRNAs of peripheral blood at different times of mastitis caused by S.aureus
Comparison	ID	PValue	FDR	log2FC	regulated
BS1 vs BS3	bta-miR-122	0	0	1.07541	up
	bta-miR-1246	0	0	-1.886	down
	bta-miR-138	1e-06	1.38e-05	-1.05626	down
	bta-miR-145	0	0	-1.16815	down
	bta-miR-223	0	0	-2.03274	down
	bta-miR-2284l	0.000584	0.00486003	1.33637	up
	bta-miR-2397-5p	2e-06	2.63e-05	1.1762	up
	bta-miR-23a	0	0	-1.5532	down
	bta-miR-2419-3p	0	0	1.00787	up
	bta-miR-30b-5p	0	0	-1.29673	down
	bta-miR-326	0	0	-1.36722	down
	bta-miR-345-5p	1e-06	1.38e-05	-1.95302	down
	bta-miR-380-3p	0.000405	0.00354496	-1.22386	down
	bta-miR-543	2e-06	2.63e-05	1.35519	up
	bta-miR-652	0	0	-1.24603	down
	bta-miR-671	0.000958	0.00749013	-1.04947	down
	bta-miR-677	0	0	1.12145	up
	bta-miR-708	3e-06	3.84e-05	-4.34192	down
	bta-miR-7857	0	0	1.01677	up
	bta-miR-885	7.7e-05	0.000770702	-1.34172	down
	conservative_10_1518	0	0	-3.2595	down
	conservative_13_4963	2e-06	2.63e-05	-3.56432	down
	conservative_14_5908	0	0	1.01317	up
	conservative_14_6599	2e-06	2.63e-05	1.05825	up
	conservative_16_7786	0.000646	0.00523713	1.28768	up
	conservative_16_8161	0	0	-3.31727	down
	conservative_17_8981	0.000102	0.000987198	-22.9711	down
	conservative_18_9908	0	0	-3.6391	down
	conservative_19_11018	5.7e-05	0.000599182	1.0007	up
	conservative_2_12879	0	0	-3.66333	down
	conservative_21_14891	0	0	1.07045	up
	conservative_23_16628	0.00062	0.00508261	1.46573	up
	conservative_26_19293	0	0	-1.4533	down
	conservative_26_19297	0	0	-1.37982	down
	conservative_26_19299	7e-06	8.54e-05	-1.12593	down
	conservative_26_19301	7e-06	8.54e-05	-1.12593	down
	conservative_28_20014	0	0	-4.88626	down
	conservative_3_21957	0.000224	0.00202522	1.48024	up
	conservative_3_22333	0	0	-1.59898	down
	conservative_4_23553	0	0	-1.46542	down
	conservative_4_24191	0.000103	0.000992504	-2.69559	down
	conservative_5_24880	0.000519	0.00440248	-1.58681	down
	conservative_6_26850	0.000601	0.0049639	1.05892	up
	conservative_6_26852	0.000601	0.0049639	1.05892	up
	conservative_6_26854	0.000601	0.0049639	1.05892	up
	conservative_X_30752	0	0	-2.48128	down
	unconservative_12_4106	0.001212	0.00908793	-1.17172	down
	unconservative_19_11205	0.000966	0.00752589	-2.75696	down
	unconservative_19_11543	0.000574	0.00481327	1.20481	up
	unconservative_23_16367	0.000222	0.0020196	2.24347	up
BS1 vs BS5	bta-miR-125b	0	0	-1.09207	down
	bta-miR-128	0	0	-1.00007	down
	bta-miR-143	0	0	-1.00694	down
	bta-miR-19a	0	0	1.31788	up
	bta-miR-19b	0	0	1.46682	up
	bta-miR-200a	0	0	-24.1178	down
	bta-miR-2284a	0	0	-4.22138	down
	bta-miR-29d-5p	0	0	1.36312	up
	bta-miR-331-3p	0	0	1.0993	up
	conservative_10_1518	0	0	-3.31451	down
	conservative_11_2759	0	0	-1.4449	down
	conservative_13_5570	0	0	-1.33322	down
	conservative_14_5901	0	0	-1.1465	down
	conservative_16_7888	0	0	-2.09588	down
	conservative_18_10284	0	0	-1.31079	down
	conservative_19_10752	0	0	-1.85652	down
	conservative_19_10913	0	0	1.91587	up
	conservative_19_12196	0	0	-1.19317	down
	conservative_1_1083	0	0	-2.22302	down
	conservative_1_120	0	0	-1.11231	down
	conservative_26_19293	0	0	-4.78161	down
	conservative_26_19297	0	0	-3.71897	down
	conservative_26_19299	0	0	-4.02922	down
	conservative_26_19301	0	0	-4.02922	down
	conservative_2_13098	0	0	-2.30397	down
	conservative_3_22333	0	0	-1.5548	down
	conservative_4_23553	0	0	-1.83199	down
	conservative_5_24962	0	0	-1.09938	down
	conservative_GJ059766.1_31932	0	0	-1.8782	down
	conservative_X_30752	0	0	1.51124	up
	unconservative_11_3658	0	0	-1.19697	down
	unconservative_19_11475	0	0	-1.43426	down
	unconservative_1_583	0	0	2.44173	up
	conservative_19_11018	1e-06	1.02524e-05	-2.39696	down
	conservative_28_20014	1e-06	1.02524e-05	-2.94127	down
	conservative_6_26309	1e-06	1.02524e-05	1.18792	up
	conservative_8_29112	1e-06	1.02524e-05	1.18792	up
	conservative_22_16076	2e-06	1.98433e-05	-1.22199	down
	unconservative_19_10937	5e-06	4.81655e-05	-1.51837	down
	unconservative_5_24349	5e-06	4.81655e-05	-1.51837	down
	unconservative_8_28952	5e-06	4.81655e-05	-1.51837	down
	unconservative_9_30254	5e-06	4.81655e-05	-1.51837	down
	bta-miR-2404	8e-06	7.53786e-05	-1.41975	down
	conservative_18_10497	1.9e-05	0.000172968	-1.00474	down
	conservative_18_10498	1.9e-05	0.000172968	-1.00474	down
	conservative_10_2200	3.6e-05	0.000309413	-1.14391	down
	bta-miR-382	3.7e-05	0.000315489	-1.51997	down
	bta-miR-502a	4.5e-05	0.000379941	-1.42507	down
	conservative_7_26976	7.6e-05	0.000624534	-1.45982	down
	conservative_25_18259	9.8e-05	0.000793211	-1.63815	down
	conservative_22_16029	0.000115	0.000923862	-1.3146	down
	bta-miR-708	0.000141	0.00112852	-2.39693	down
	bta-miR-129-3p	0.00019	0.00149842	1.5319	up
	conservative_4_24191	0.000227	0.00176437	-2.33556	down
	bta-miR-2388-5p	0.000243	0.00187519	-1.19059	down
	bta-miR-543	0.000245	0.00188387	-1.76618	down
	conservative_2_13243	0.000281	0.00213778	-1.47515	down
	conservative_10_1900	0.000443	0.00323315	-2.8994	down
	bta-miR-34a	0.000492	0.00350754	1.06767	up
	bta-miR-2478	0.000529	0.00372202	-2.47497	down
	bta-miR-182	0.000534	0.0037328	1.66194	up
	bta-miR-193a-5p	0.000543	0.00377122	-1.66993	down
	conservative_21_15268	0.000589	0.00403859	-1.87084	down
	conservative_2_13305	0.000644	0.00439471	1.56634	up
	conservative_2_13306	0.000644	0.00439471	1.56634	up
	conservative_10_2021	0.000726	0.00488462	1.01101	up
	conservative_1_1109	0.000742	0.00496126	-1.54898	down
	conservative_21_14451	0.000839	0.00554951	1.60305	up
	conservative_9_30130	0.000839	0.00554951	1.60305	up
	conservative_22_16072	0.000858	0.00563193	-2.397	down
	conservative_18_9972	0.000894	0.0058504	-1.25273	down
	conservative_6_26349	0.000899	0.00586529	-1.08774	down
	conservative_16_8226	0.000976	0.0062914	-22.4857	down
	conservative_8_28713	0.001079	0.00691395	2.1879	up
	conservative_5_25479	0.001119	0.00714898	-1.31468	down
	conservative_11_3237	0.001243	0.00787111	-2.7189	down
	conservative_19_11527	0.001243	0.00787111	-2.7189	down
	conservative_3_22208	0.001243	0.00787111	-2.7189	down
	unconservative_5_25302	0.001422	0.0088741	-2.05993	down
	conservative_11_3124	0.001477	0.00913788	-1.15318	down
BS1 vs BS7	bta-miR-106b	0	0	-1.01985	down
	bta-miR-1291	0	0	1.0389	up
	bta-miR-142-3p	0	0	-1.3468	down
	bta-miR-143	0	0	-1.13204	down
	bta-miR-144	0	0	-1.83713	down
	bta-miR-151-5p	0	0	-1.08385	down
	bta-miR-223	0	0	-1.30295	down
	bta-miR-2284a	0	0	-3.75315	down
	bta-miR-32	0	0	-1.58589	down
	bta-miR-320a	0	0	1.3013	up
	bta-miR-326	0	0	-1.43005	down
	bta-miR-6123	0	0	-1.18356	down
	bta-miR-677	0	0	1.84284	up
	conservative_10_1518	0	0	-3.75297	down
	conservative_10_2599	0	0	1.16299	up
	conservative_11_3473	0	0	-1.27756	down
	conservative_16_7888	0	0	-1.77256	down
	conservative_18_10497	0	0	-1.44325	down
	conservative_18_10498	0	0	-1.44325	down
	conservative_18_9908	0	0	1.17964	up
	conservative_19_10814	0	0	-1.30337	down
	conservative_1_1083	0	0	-2.28808	down
	conservative_21_14891	0	0	1.25463	up
	conservative_22_16076	0	0	-1.50436	down
	conservative_23_16728	0	0	-1.10842	down
	conservative_26_19293	0	0	-1.69664	down
	conservative_26_19297	0	0	-1.8293	down
	conservative_2_12879	0	0	1.28546	up
	conservative_2_13098	0	0	-1.98753	down
	conservative_3_22333	0	0	-2.21093	down
	conservative_4_23553	0	0	-1.3424	down
	conservative_X_30752	0	0	2.77435	up
	conservative_X_31314	0	0	-1.25061	down
	unconservative_6_26259	0	0	-1.08067	down
	unconservative_X_31822	0	0	-1.08397	down
	bta-miR-200a	1e-06	1.17204e-05	-3.61969	down
	bta-miR-2446	1e-06	1.17204e-05	1.40254	up
	conservative_11_3520	1e-06	1.17204e-05	-1.12202	down
	conservative_16_8161	1e-06	1.17204e-05	1.09557	up
	conservative_19_11018	1e-06	1.17204e-05	-2.47286	down
	conservative_28_20014	1e-06	1.17204e-05	-3.21014	down
	conservative_21_15268	3e-06	3.32824e-05	-4.31028	down
	bta-miR-708	5e-06	5.38272e-05	-4.25141	down
	bta-miR-2299-3p	6e-06	6.41176e-05	-1.2033	down
	conservative_26_19299	7e-06	7.38983e-05	-1.16041	down
	conservative_26_19301	7e-06	7.38983e-05	-1.16041	down
	conservative_1_1070	8e-06	8.30476e-05	-1.04956	down
	conservative_1_201	8e-06	8.30476e-05	-1.01355	down
	unconservative_1_583	8e-06	8.30476e-05	1.84345	up
	conservative_4_24191	9e-06	9.25472e-05	-4.19004	down
	bta-miR-1388-3p	2.9e-05	0.000292685	-1.09188	down
	conservative_10_2021	4.2e-05	0.000412432	1.27774	up
	bta-miR-345-5p	4.3e-05	0.00041755	-1.44697	down
	conservative_5_25835	4.6e-05	0.000437904	-1.11145	down
	conservative_23_16628	4.9e-05	0.000464435	1.74944	up
	bta-miR-18b	5.6e-05	0.000528485	-1.02113	down
	conservative_GJ059766.1_31932	6.4e-05	0.000593702	-1.20814	down
	conservative_10_2200	0.000142	0.00122841	-1.04811	down
	conservative_6_26405	0.000142	0.00122841	-1.04811	down
	conservative_17_8981	0.000157	0.00133695	-22.9711	down
	unconservative_12_4106	0.000241	0.00198257	-1.52806	down
	conservative_1_456	0.000341	0.00275326	-1.62496	down
	conservative_3_21957	0.000655	0.00502782	1.3849	up
	conservative_15_6824	0.000663	0.00506249	-1.16315	down
	conservative_7_27896	0.000663	0.00506249	-1.05467	down
	bta-miR-299	0.000724	0.00548028	-2.40277	down
	bta-miR-380-3p	0.000878	0.00648827	-1.13279	down
	conservative_1_610	0.000905	0.0066652	-22.6231	down
	conservative_26_19461	0.000913	0.00670148	-1.37606	down
	conservative_4_23878	0.001041	0.00746507	-3.47389	down
	conservative_25_18259	0.001129	0.00799097	-1.25053	down
	conservative_22_16029	0.001201	0.00841859	-1.01618	down
	unconservative_9_30302	0.001275	0.00888019	-2.05776	down
	unconservative_27_19658	0.001301	0.00903242	1.3933	up
	conservative_11_2998	0.00131	0.00906603	-1.38812	down
	unconservative_3_22546	0.001344	0.00924265	2.44972	up
	conservative_2_13801	0.001403	0.00952816	-1.05026	down
	bta-miR-21-3p	0.001404	0.00950534	-1.72434	down
	conservative_19_12208	0.001407	0.00949616	1.33442	up
	bta-miR-205	0.001412	0.00950049	-1.61317	down
BS3 vs BS5	bta-let-7a-5p	0	0	-1.28136	down
	bta-let-7d	0	0	-1.21323	down
	bta-miR-122	0	0	-2.04926	down
	bta-miR-1246	0	0	2.1541	up
	bta-miR-125a	0	0	-1.59891	down
	bta-miR-125b	0	0	-1.14809	down
	bta-miR-126-3p	0	0	-1.40296	down
	bta-miR-128	0	0	-1.97766	down
	bta-miR-129-3p	0	0	3.40429	up
	bta-miR-1307	0	0	-1.09386	down
	bta-miR-138	0	0	1.94461	up
	bta-miR-143	0	0	-1.00774	down
	bta-miR-1468	0	0	-1.5826	down
	bta-miR-146a	0	0	1.17719	up
	bta-miR-16b	0	0	1.22033	up
	bta-miR-193b	0	0	1.35542	up
	bta-miR-19b	0	0	1.5804	up
	bta-miR-200a	0	0	-23.9919	down
	bta-miR-223	0	0	1.14903	up
	bta-miR-224	0	0	-1.02531	down
	bta-miR-2284a	0	0	-3.91324	down
	bta-miR-2376	0	0	-1.15807	down
	bta-miR-2388-5p	0	0	-2.14285	down
	bta-miR-2397-5p	0	0	-1.98826	down
	bta-miR-23a	0	0	1.73222	up
	bta-miR-23b-3p	0	0	1.05497	up
	bta-miR-2415-3p	0	0	-1.08394	down
	bta-miR-2419-5p	0	0	-1.27306	down
	bta-miR-2419-3p	0	0	-1.87615	down
	bta-miR-2903	0	0	1.562	up
	bta-miR-29d-5p	0	0	1.82906	up
	bta-miR-30b-5p	0	0	2.14708	up
	bta-miR-326	0	0	1.4103	up
	bta-miR-328	0	0	-1.21324	down
	bta-miR-331-3p	0	0	1.98097	up
	bta-miR-340	0	0	-1.18447	down
	bta-miR-342	0	0	1.36834	up
	bta-miR-345-5p	0	0	2.00345	up
	bta-miR-3613a	0	0	-1.00693	down
	bta-miR-382	0	0	-1.90342	down
	bta-miR-451	0	0	1.04854	up
	bta-miR-499	0	0	-1.23721	down
	bta-miR-500	0	0	1.34317	up
	bta-miR-543	0	0	-3.12137	down
	bta-miR-652	0	0	1.06312	up
	bta-miR-744	0	0	-1.02232	down
	bta-miR-7857	0	0	-1.19142	down
	bta-miR-7860	0	0	-1.18895	down
	conservative_11_2759	0	0	-2.30241	down
	conservative_11_2764	0	0	-1.3773	down
	conservative_13_5570	0	0	-1.7886	down
	conservative_14_5901	0	0	-1.98301	down
	conservative_14_5908	0	0	-1.00212	down
	conservative_16_7888	0	0	-1.90685	down
	conservative_16_8161	0	0	3.90794	up
	conservative_18_9908	0	0	4.35376	up
	conservative_19_10681	0	0	-1.47574	down
	conservative_19_10772	0	0	1.79166	up
	conservative_19_10913	0	0	3.67231	up
	conservative_19_11018	0	0	-3.39766	down
	conservative_1_1083	0	0	-1.98826	down
	conservative_1_120	0	0	-1.33801	down
	conservative_21_14891	0	0	-1.31316	down
	conservative_21_15256	0	0	-1.16367	down
	conservative_25_17932	0	0	-1.13461	down
	conservative_26_19293	0	0	-3.32831	down
	conservative_26_19297	0	0	-2.33915	down
	conservative_26_19299	0	0	-2.90329	down
	conservative_26_19301	0	0	-2.90329	down
	conservative_29_21013	0	0	-1.36205	down
	conservative_2_12879	0	0	4.42011	up
	conservative_2_13098	0	0	-2.12151	down
	conservative_5_24962	0	0	-1.66459	down
	conservative_X_30752	0	0	3.99252	up
	unconservative_11_3658	0	0	-1.39722	down
	unconservative_19_11475	0	0	-1.33713	down
	unconservative_1_583	0	0	1.81138	up
	unconservative_4_23629	0	0	-1.37114	down
	unconservative_6_26099	0	0	-1.02168	down
	unconservative_8_28625	0	0	-1.04795	down
	bta-miR-34a	1e-06	9.78899e-06	2.00884	up
	conservative_19_10752	1e-06	9.78899e-06	-1.78334	down
	conservative_6_26349	1e-06	9.78899e-06	-1.66542	down
	conservative_6_26850	1e-06	9.78899e-06	-2.05549	down
	conservative_6_26852	1e-06	9.78899e-06	-2.05549	down
	conservative_6_26854	1e-06	9.78899e-06	-2.05549	down
	unconservative_19_10937	1e-06	9.78899e-06	-1.66542	down
	unconservative_5_24349	1e-06	9.78899e-06	-1.66542	down
	unconservative_8_28952	1e-06	9.78899e-06	-1.66542	down
	unconservative_9_30254	1e-06	9.78899e-06	-1.66542	down
	bta-miR-145	2e-06	1.86783e-05	1.04225	up
	bta-miR-324	2e-06	1.86783e-05	2.34668	up
	bta-miR-6520	2e-06	1.86783e-05	-1.17639	down
	conservative_20_13949	2e-06	1.86783e-05	2.48884	up
	unconservative_23_16367	3e-06	2.74176e-05	-4.37725	down
	bta-miR-2408	4e-06	3.62463e-05	-1.14285	down
	conservative_22_16076	4e-06	3.62463e-05	-1.21152	down
	conservative_2_13305	5e-06	4.46444e-05	3.06039	up
	conservative_2_13306	5e-06	4.46444e-05	3.06039	up
	conservative_3_21957	5e-06	4.46444e-05	-2.2923	down
	unconservative_19_12123	7e-06	6.12213e-05	-1.22526	down
	unconservative_19_12124	7e-06	6.12213e-05	-1.22526	down
	bta-miR-2404	1e-05	8.60484e-05	-1.44442	down
	conservative_13_4963	1.2e-05	0.000102637	3.40433	up
	conservative_10_2160	1.9e-05	0.000160897	-1.05537	down
	bta-miR-2284l	2.1e-05	0.00017713	-2.05527	down
	conservative_18_10497	2.4e-05	0.000198512	-1.0206	down
	conservative_18_10498	2.4e-05	0.000198512	-1.0206	down
	bta-miR-2397-3p	2.5e-05	0.000204406	-1.40586	down
	conservative_7_26976	2.9e-05	0.000234417	-1.57477	down
	bta-miR-2308	3.5e-05	0.00027663	-3.30315	down
	conservative_GJ059766.1_31932	5.5e-05	0.000429141	-1.48165	down
	unconservative_12_4106	5.9e-05	0.00045784	1.49716	up
	conservative_21_15215	6.4e-05	0.000494841	-1.10114	down
	conservative_19_11244	6.5e-05	0.000499856	-1.01585	down
	unconservative_19_11205	6.8e-05	0.000520115	3.19281	up
	conservative_25_17983	7.4e-05	0.000563986	-2.79228	down
	bta-miR-2443	7.9e-05	0.000597823	-1.10265	down
	bta-miR-885	8e-05	0.000603251	1.35971	up
	conservative_11_3124	9.9e-05	0.000741284	-1.47045	down
	unconservative_26_19584	0.00015	0.00109623	22.9364	up
	bta-miR-545-3p	0.000154	0.00112162	2.40381	up
	conservative_18_9441	0.000174	0.00125445	-3.86266	down
	conservative_9_30087	0.000194	0.00138925	1.25134	up
	conservative_22_16019	0.0002	0.00142742	-1.03111	down
	conservative_3_22109	0.000213	0.00151011	-1.59603	down
	unconservative_2_13023	0.000214	0.00151217	-1.1809	down
	conservative_19_11527	0.000218	0.00153535	-3.05527	down
	conservative_23_16628	0.000306	0.00212705	-1.69273	down
	conservative_21_14623	0.000323	0.00223793	-1.55024	down
	bta-miR-193a-5p	0.000365	0.00251261	-1.75569	down
	conservative_10_2574	0.000387	0.00262594	-2.30315	down
	conservative_10_2578	0.000387	0.00262594	-2.30315	down
	conservative_1_1347	0.000387	0.00262594	-2.30315	down
	conservative_1_1348	0.000387	0.00262594	-2.30315	down
	bta-miR-30b-3p	0.000397	0.00267255	-1.47048	down
	unconservative_17_9178	0.000479	0.00319433	-1.39938	down
	bta-miR-129	0.000593	0.00387584	-1.54073	down
	bta-miR-129-5p	0.000593	0.00387584	-1.54073	down
	conservative_23_16788	0.000629	0.00409234	-3.64032	down
	conservative_23_16214	0.000711	0.0045978	-2.86266	down
	bta-miR-335	0.000737	0.00475153	1.24716	up
	conservative_8_29339	0.000805	0.00514332	-22.5768	down
	unconservative_19_11543	0.000866	0.00545951	-1.1774	down
	bta-miR-212	0.000878	0.00551074	-1.64023	down
	conservative_21_14480	0.000946	0.0058685	-1.98122	down
	conservative_10_2176	0.001086	0.00656522	-2.14271	down
	conservative_19_12062	0.001095	0.00660093	-1.52919	down
	unconservative_1_1354	0.001173	0.00701171	-1.24807	down
	unconservative_4_23546	0.001209	0.00720672	-2.37721	down
	conservative_22_15702	0.001343	0.00789521	-1.57884	down
BS3 vs BS7	bta-miR-126-3p	0	0	-1.07431	down
	bta-miR-143	0	0	-1.13284	down
	bta-miR-144	0	0	-1.56983	down
	bta-miR-2284a	0	0	-3.44501	down
	bta-miR-2397-5p	0	0	-1.49389	down
	bta-miR-23a	0	0	1.42075	up
	bta-miR-2411-3p	0	0	1.40367	up
	bta-miR-32	0	0	-1.1247	down
	bta-miR-342	0	0	1.07003	up
	bta-miR-411a	0	0	-1.05917	down
	bta-miR-499	0	0	-1.12894	down
	conservative_10_1907	0	0	-1.34459	down
	conservative_11_2759	0	0	-1.0246	down
	conservative_13_5538	0	0	-1.31859	down
	conservative_16_7888	0	0	-1.58354	down
	conservative_16_8161	0	0	4.41284	up
	conservative_18_10497	0	0	-1.4591	down
	conservative_18_10498	0	0	-1.4591	down
	conservative_18_9908	0	0	4.81874	up
	conservative_19_10681	0	0	-1.55877	down
	conservative_19_10772	0	0	1.74477	up
	conservative_19_10814	0	0	-1.01392	down
	conservative_19_11018	0	0	-3.47356	down
	conservative_1_1070	0	0	-1.29287	down
	conservative_1_1083	0	0	-2.05333	down
	conservative_22_16076	0	0	-1.49389	down
	conservative_2_12879	0	0	4.9488	up
	conservative_2_13098	0	0	-1.80506	down
	conservative_3_21494	0	0	1.54247	up
	conservative_X_30752	0	0	5.25563	up
	unconservative_6_26259	0	0	-1.09655	down
	unconservative_X_31822	0	0	-1.09336	down
	conservative_11_2998	1e-06	1.30334e-05	-2.07891	down
	bta-miR-2284l	4e-06	4.94294e-05	-2.58704	down
	bta-miR-200a	5e-06	6.10826e-05	-3.49374	down
	bta-miR-543	8e-06	9.58212e-05	-1.33114	down
	conservative_18_9544	2.8e-05	0.000315958	-1.83498	down
	bta-miR-1248	4.8e-05	0.000525061	1.6385	up
	bta-miR-2446	4.9e-05	0.000530586	1.11346	up
	conservative_25_18149	4.9e-05	0.000530586	-23.2143	down
	bta-miR-495	5.6e-05	0.00060032	-1.29796	down
	conservative_21_15268	5.8e-05	0.000612571	-3.99719	down
	unconservative_5_25477	7.4e-05	0.000766454	-1.33341	down
	bta-miR-2285x	9.8e-05	0.000995791	-1.18194	down
	bta-miR-1246	0.0002	0.00191429	1.3765	up
	bta-miR-2285o	0.000205	0.00194478	-2.172	down
	unconservative_25_18059	0.00021	0.00197042	-1.189	down
	unconservative_25_18060	0.00021	0.00197042	-1.189	down
	conservative_16_8231	0.000329	0.00303388	-2.11061	down
	conservative_3_22229	0.000329	0.00303388	-2.11061	down
	conservative_6_26263	0.000382	0.00348514	-1.24773	down
	conservative_22_15856	0.000531	0.0047044	-1.21379	down
	bta-miR-335	0.000535	0.00472033	1.31346	up
	bta-miR-34a	0.000602	0.0052467	1.48968	up
	conservative_11_3124	0.000618	0.00534271	-1.23082	down
	conservative_2_12817	0.000642	0.00548386	2.8987	up
	unconservative_1_583	0.000699	0.00590022	1.2131	up
	conservative_14_6255	0.00072	0.00600654	-1.07119	down
	conservative_2_13445	0.000731	0.00605121	-1.12045	down
	conservative_3_22702	0.000827	0.00681957	-1.97939	down
	conservative_21_14480	0.000864	0.00696397	-2.15666	down
	bta-miR-24	0.000932	0.00744212	-1.00004	down
	bta-miR-301b	0.000932	0.00744212	-1.00004	down
	bta-miR-2285ad	0.001064	0.00829533	-1.68652	down
BS5 vs BS7	bta-let-7a-5p	0	0	1.30067	up
	bta-let-7c	0	0	1.03346	up
	bta-let-7d	0	0	1.21918	up
	bta-miR-106b	0	0	-1.16255	down
	bta-miR-122	0	0	1.49264	up
	bta-miR-125a	0	0	1.13277	up
	bta-miR-128	0	0	1.2066	up
	bta-miR-138	0	0	-1.32517	down
	bta-miR-142-3p	0	0	-1.40572	down
	bta-miR-1468	0	0	1.3043	up
	bta-miR-185	0	0	1.0411	up
	bta-miR-193b	0	0	-1.2987	down
	bta-miR-224	0	0	1.03303	up
	bta-miR-2419-3p	0	0	1.05962	up
	bta-miR-29c	0	0	-1.25987	down
	bta-miR-29d-5p	0	0	-1.62356	down
	bta-miR-30b-5p	0	0	-1.78431	down
	bta-miR-32	0	0	-1.30606	down
	bta-miR-326	0	0	-1.47313	down
	bta-miR-331-3p	0	0	-1.44427	down
	bta-miR-500	0	0	-1.42612	down
	bta-miR-6123	0	0	-1.09748	down
	bta-miR-677	0	0	1.00376	up
	conservative_11_2759	0	0	1.27781	up
	conservative_12_3941	0	0	1.30294	up
	conservative_13_5538	0	0	-1.0821	down
	conservative_13_5570	0	0	1.11808	up
	conservative_14_5901	0	0	1.56539	up
	conservative_19_10913	0	0	-1.99655	down
	conservative_21_14891	0	0	1.49735	up
	conservative_26_19297	0	0	1.88967	up
	conservative_26_19299	0	0	2.86881	up
	conservative_26_19301	0	0	2.86881	up
	conservative_3_21494	0	0	1.65794	up
	conservative_5_24962	0	0	1.42369	up
	conservative_X_30752	0	0	1.26311	up
	unconservative_19_11475	0	0	1.36883	up
	unconservative_6_26259	0	0	-1.53329	down
	unconservative_8_28625	0	0	1.01079	up
	unconservative_X_31822	0	0	-1.52342	down
	conservative_1_1070	1e-06	1.25089e-05	-1.16844	down
	bta-miR-382	2e-06	2.39547e-05	1.79419	up
	unconservative_15_7480	2e-06	2.39547e-05	-1.03577	down
	bta-miR-2388-5p	3e-06	3.51357e-05	1.57942	up
	conservative_8_28770	4e-06	4.63342e-05	-1.26857	down
	bta-miR-2285x	7e-06	7.8504e-05	-1.35607	down
	conservative_26_19293	7e-06	7.8504e-05	3.08497	up
	unconservative_12_4106	9e-06	9.93525e-05	-1.8535	down
	unconservative_5_24632	1.2e-05	0.000130092	-1.18476	down
	conservative_22_16019	1.4e-05	0.00014798	1.23952	up
	conservative_15_6626	1.5e-05	0.00015737	-1.12366	down
	conservative_GJ059782.1_31949	1.5e-05	0.00015737	-1.12366	down
	bta-miR-193a-5p	1.7e-05	0.000177034	2.10053	up
	conservative_3_21957	2e-05	0.000206748	2.19695	up
	bta-miR-2411-3p	2.1e-05	0.000214983	1.05569	up
	conservative_23_16628	2.5e-05	0.000253477	1.97645	up
	bta-miR-345-5p	3.1e-05	0.000310588	-1.4974	down
	unconservative_3_22546	3.3e-05	0.000326754	23.1985	up
	unconservative_19_10937	4.1e-05	0.000397587	1.42211	up
	unconservative_5_24349	4.1e-05	0.000397587	1.42211	up
	unconservative_8_28952	4.1e-05	0.000397587	1.42211	up
	unconservative_9_30254	4.1e-05	0.000397587	1.42211	up
	conservative_11_2998	4.8e-05	0.000457081	-1.77959	down
	conservative_19_10752	5.5e-05	0.000520224	1.50401	up
	unconservative_2_13023	6.4e-05	0.000593404	1.30173	up
	conservative_7_26976	7e-05	0.000646201	1.52502	up
	bta-miR-2320-3p	8e-05	0.000725837	1.00705	up
	unconservative_19_12123	9.4e-05	0.000840237	1.07715	up
	unconservative_19_12124	9.4e-05	0.000840237	1.07715	up
	bta-miR-2397-3p	0.000152	0.0013278	1.28397	up
	conservative_9_30087	0.000166	0.00144413	-1.32071	down
	bta-miR-2404	0.000172	0.0014902	1.24598	up
	conservative_1_1109	0.000173	0.00149274	1.78378	up
	conservative_4_23988	0.000305	0.00253846	22.8199	up
	conservative_20_13949	0.000317	0.00261773	-1.52332	down
	bta-miR-543	0.000343	0.00281047	1.79023	up
	bta-miR-129	0.000345	0.00281052	1.63178	up
	bta-miR-129-5p	0.000345	0.00281052	1.63178	up
	conservative_25_18573	0.000359	0.00290776	-1.13367	down
	conservative_3_22109	0.000421	0.00333331	1.54507	up
	bta-miR-301b	0.000493	0.00386001	-1.05791	down
	conservative_2_13243	0.000502	0.00391597	1.46847	up
	unconservative_27_19658	0.000682	0.00520487	1.62031	up
	bta-miR-545-3p	0.000723	0.00541994	-1.99111	down
	conservative_21_14574	0.000945	0.00681819	2.84686	up
	bta-miR-21-3p	0.001061	0.00755203	-1.79201	down
	unconservative_23_17282	0.001388	0.00958899	1.8093	up
	conservative_4_23878	0.001433	0.00983559	-3.43926	down
	conservative_18_9972	0.00144	0.00983574	1.24605	up
	unconservative_1_1354	0.00144	0.00983574	1.24605	up
